# Supplementary material for: Microbiota-mediated skewing of tryptophan catabolism modulates CD4+ T cells in lupus-prone mice
Source: PubMed Central journal article supplement — iScience. 2022 Apr 12;25(5):104241. doi: 10.1016/j.isci.2022.104241 (PMC9051618; doi:10.1016/j.isci.2022.104241), 2022-04-12
Supplement: mmc1.pdf [file mmc1.pdf]

**Supplemental information**

**Microbiota-mediated skewing of tryptophan  
catabolism modulates CD4<sup>+</sup> T cells  
in lupus-prone mice**

**Josephine Brown, Georges Abboud, Longhuan Ma, Seung-Chul Choi, Nathalie Kanda, Leilani Zeumer-Spataro, Jean Lee, Weidan Peng, Joy Cagmat, Tamas Faludi, Mansour Mohamadzadeh, Timothy Garrett, Laura Mandik-Nayak, Alexander Chervonsky, Andras Perl, and Laurence Morel**

A

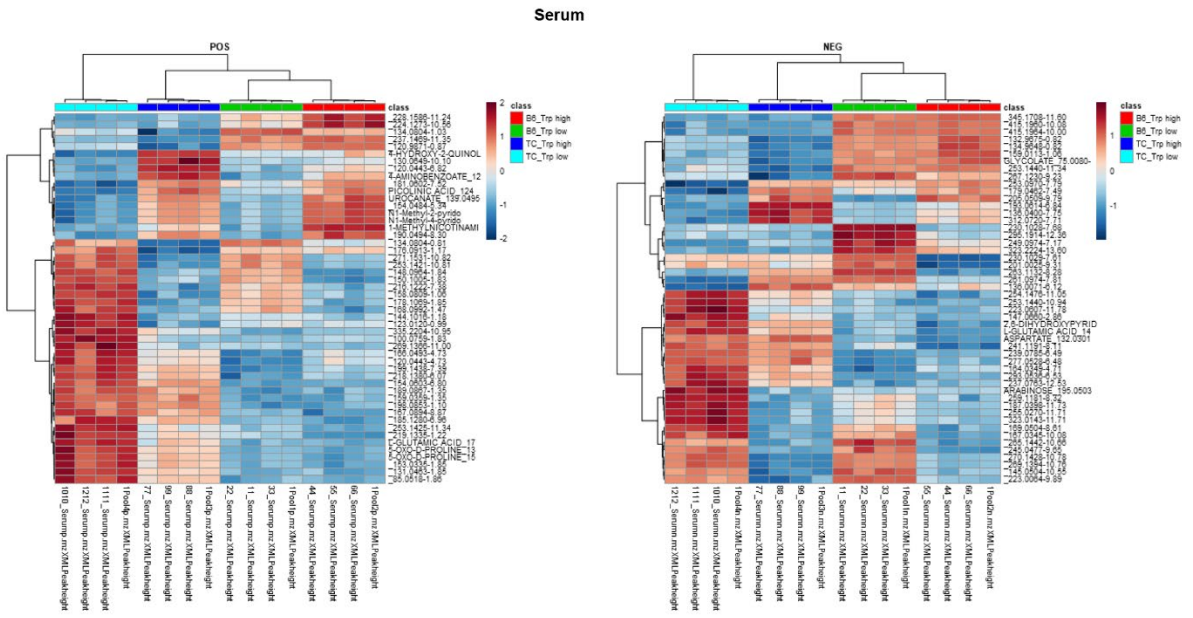

B

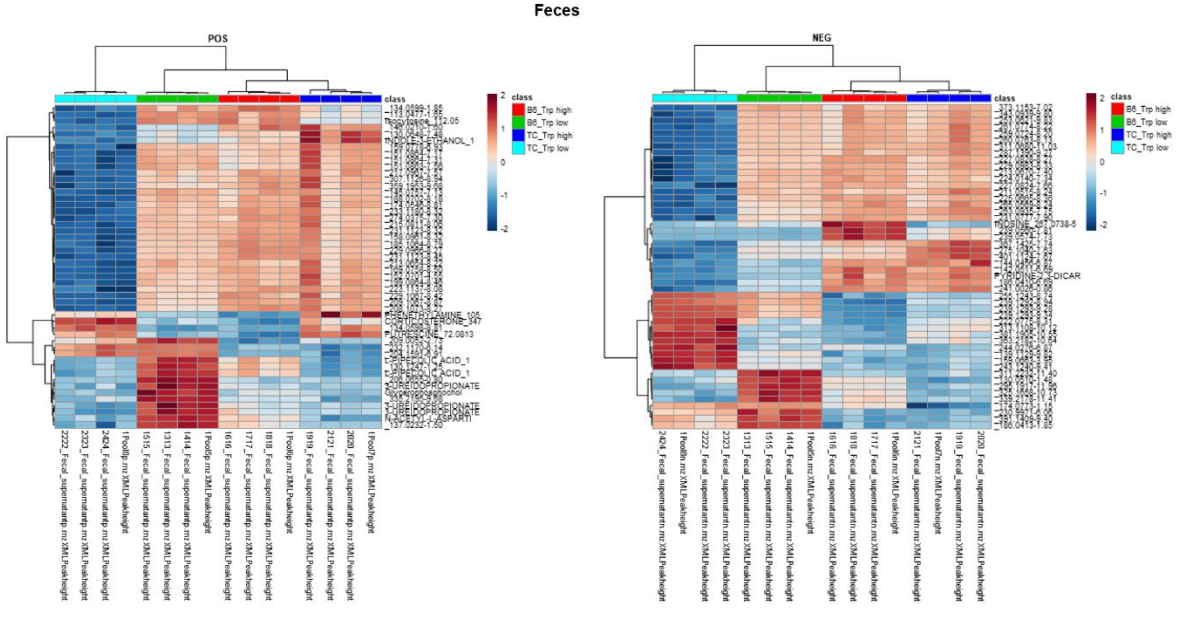

**Figure S1.** Heat maps of the top 50 metabolites as determined from ANOVA from serum) and feces from B6 and TC mice fed high or low tryptophan for 1 month. Related to Figure 1.



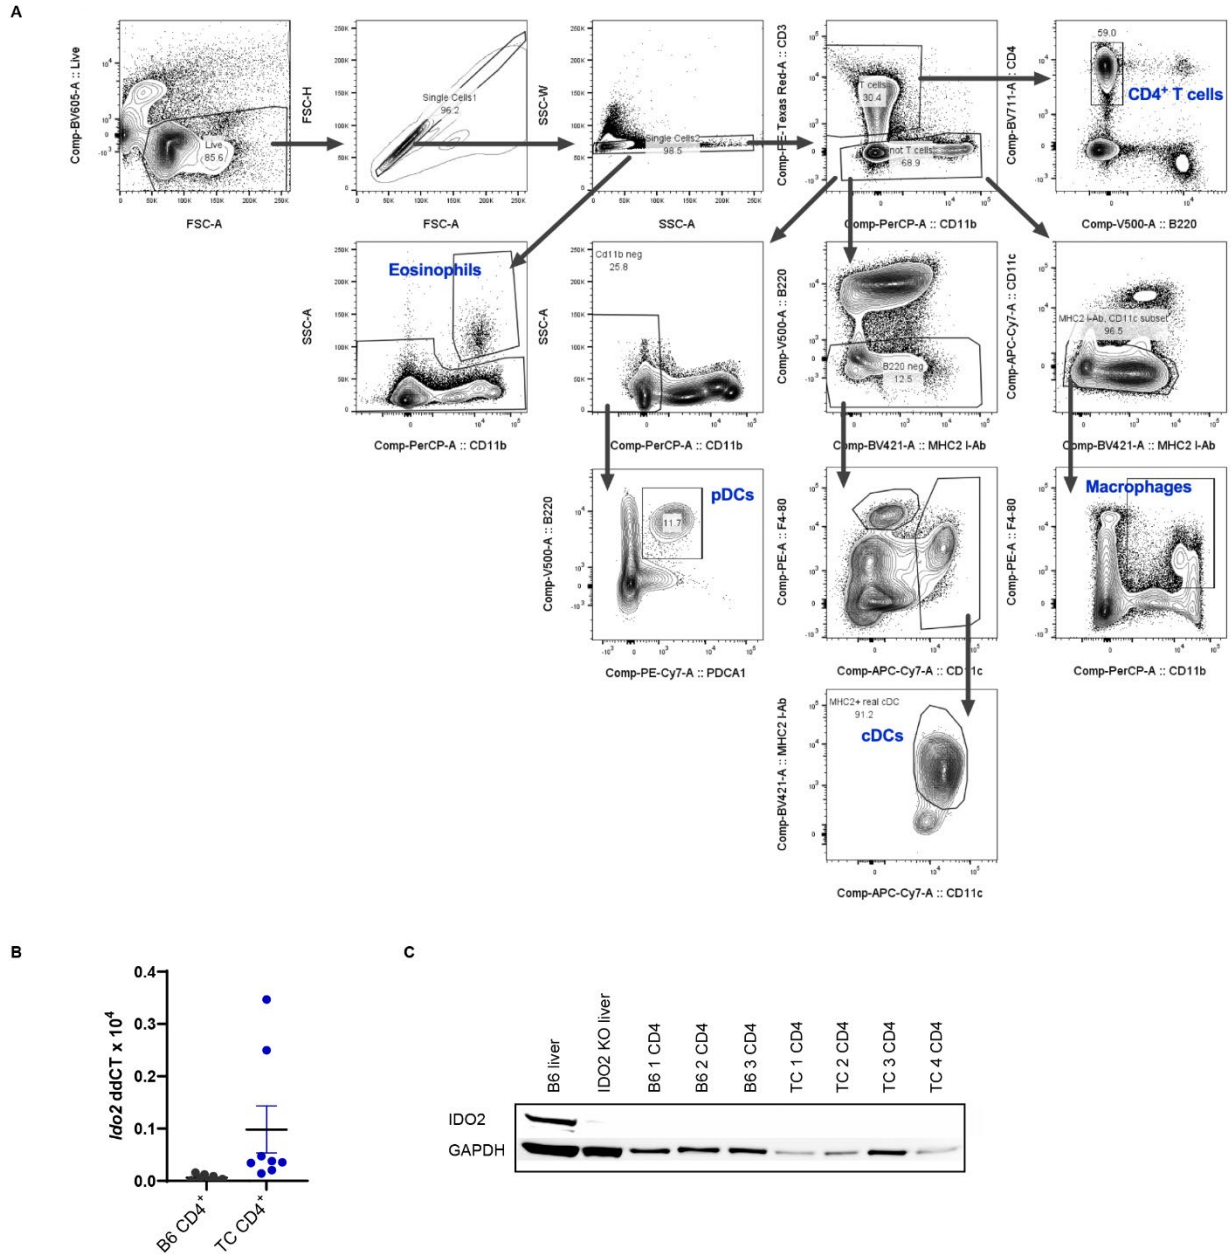

**Figure S3. A.** Gating strategy for splenocytes populations and *Ido2* gene expression. Related to Figure 4.

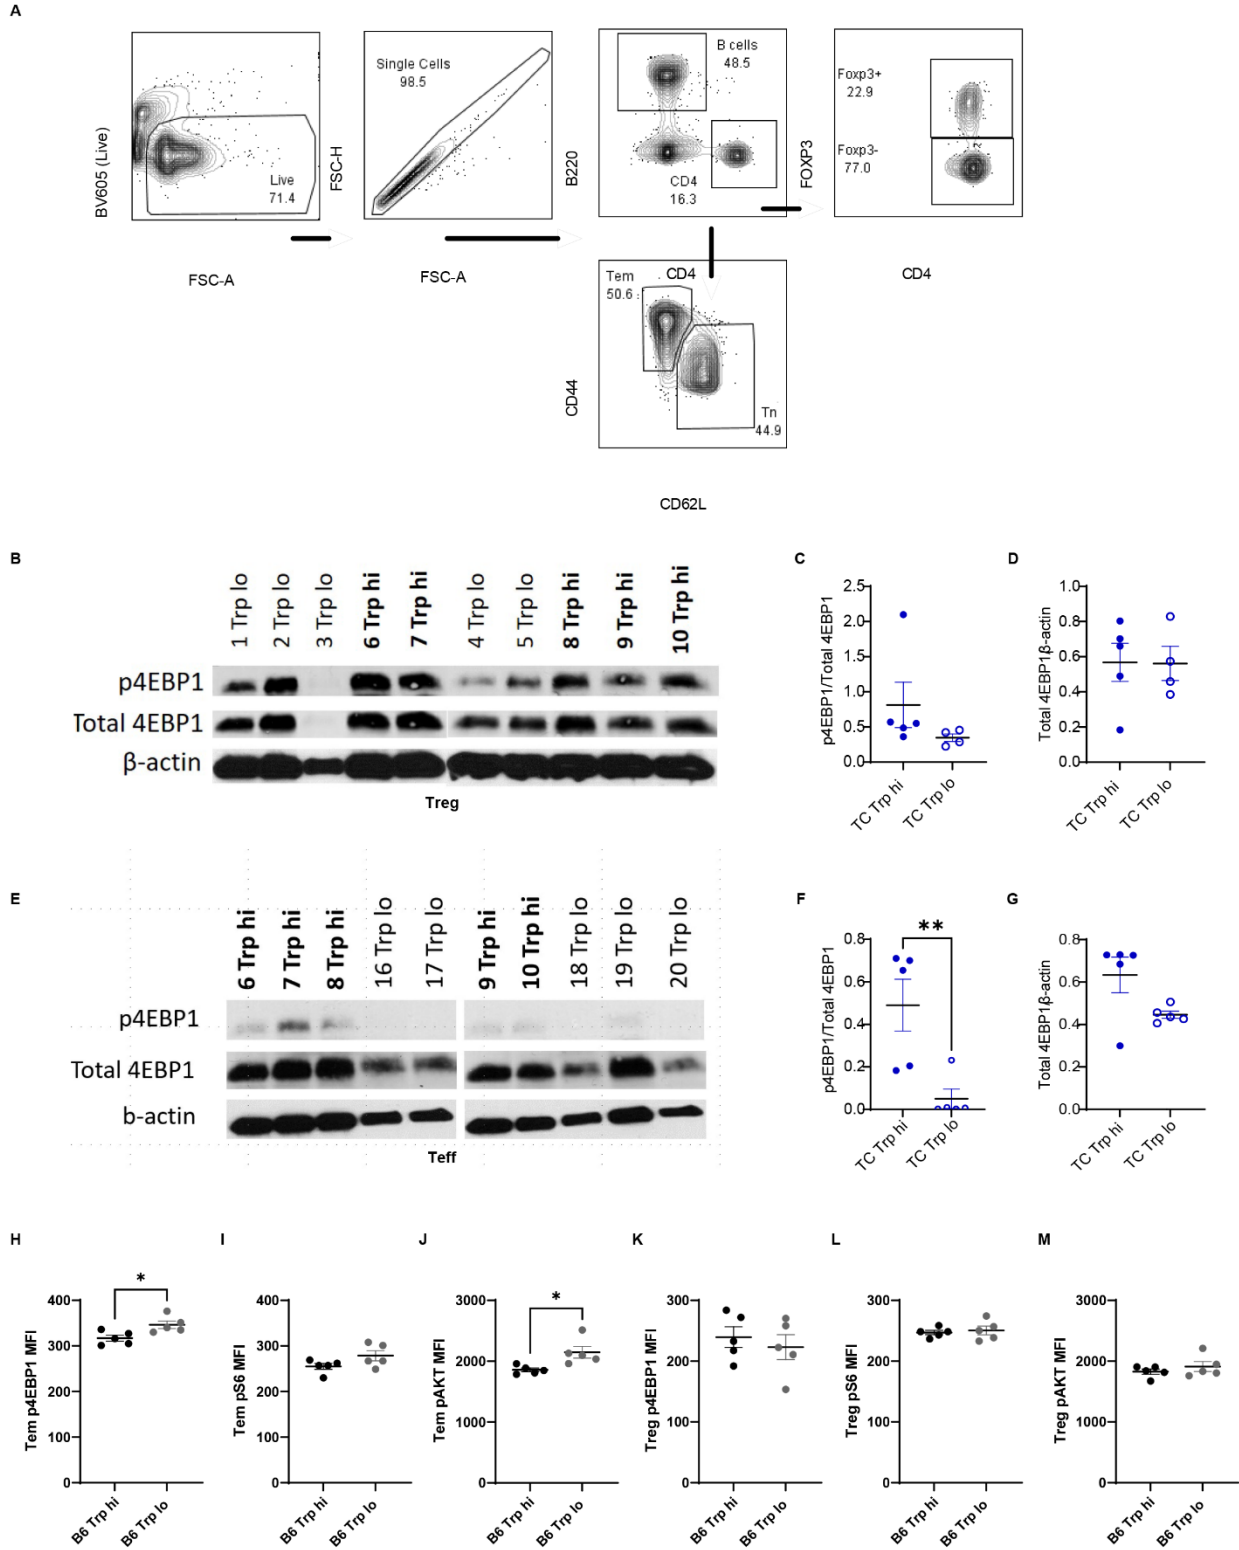

**Figure S4.** Gating strategy for Treg, Tn and Tem cells and expression of targets of mTOR signaling. Related to Figure 6.



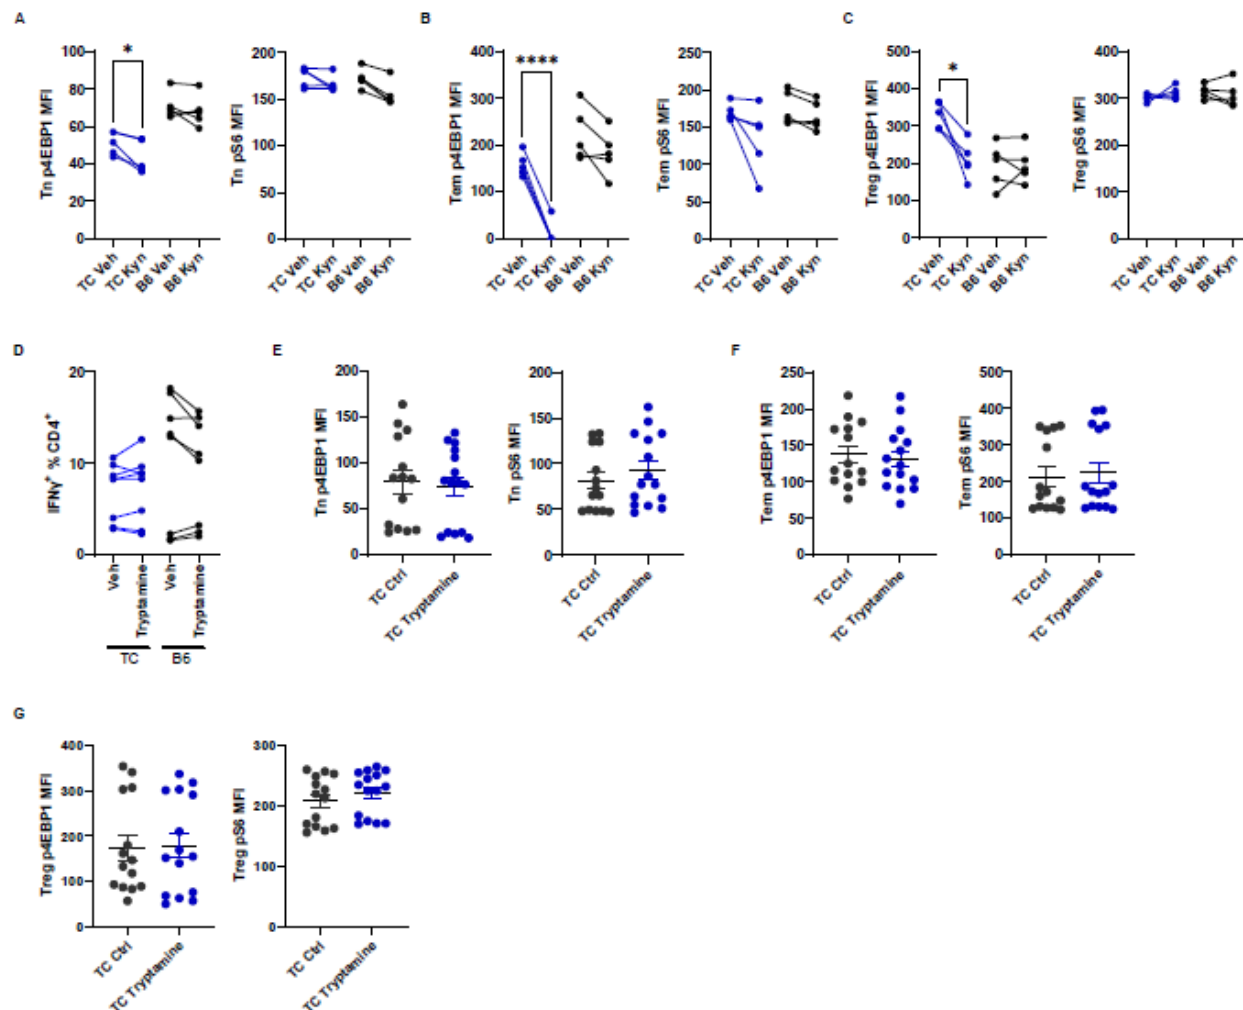

**Figure S5.** Effect of kynurenine and tryptamine on TC and B6 T cell phenotypes. Related to Figure 7.

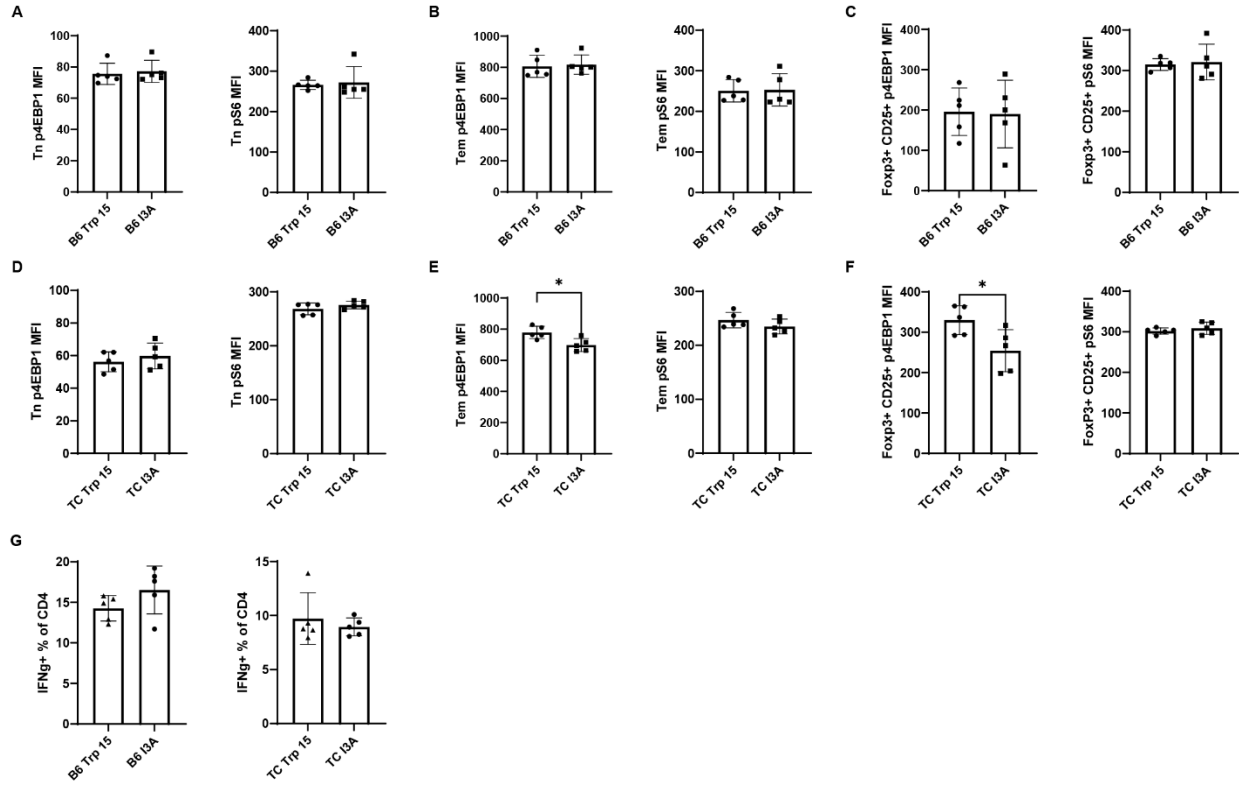

**Figure S6.** Effect of I3A on TC and B6 T cell phenotypes. Related to Figure 7.
